# Supplementary material for: Pairwise common variant meta-analyses of schizophrenia with other psychiatric disorders reveals shared and distinct gene and gene-set associations
Source: PubMed Central journal article supplement (PMC7217970; doi:10.1038/s41398-020-0817-7), 2020-05-12
Supplement: 41398_2020_817_MOESM1_ESM.pdf [file 41398_2020_817_MOESM1_ESM.pdf]

# Supplementary Figure 1

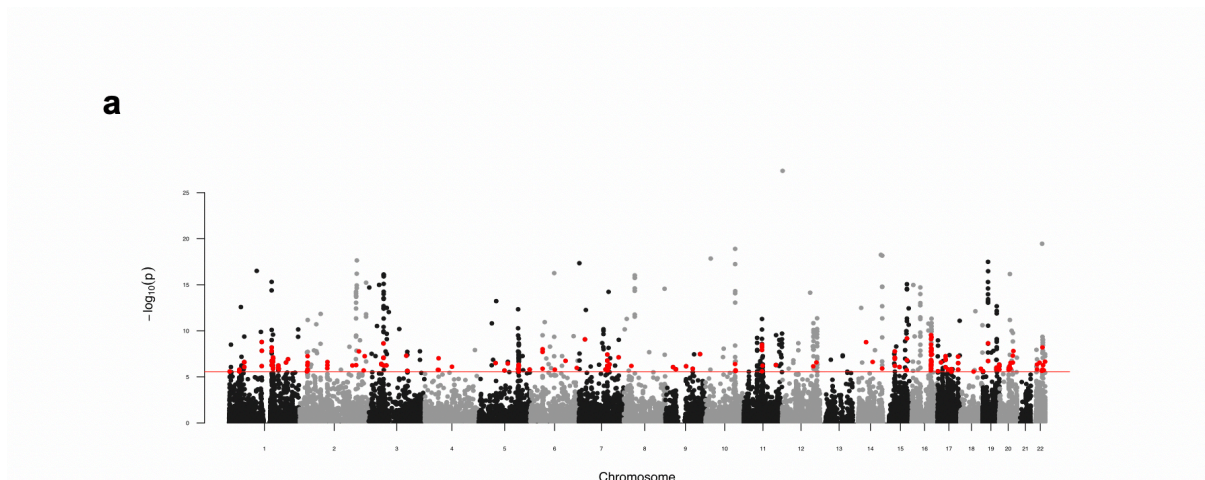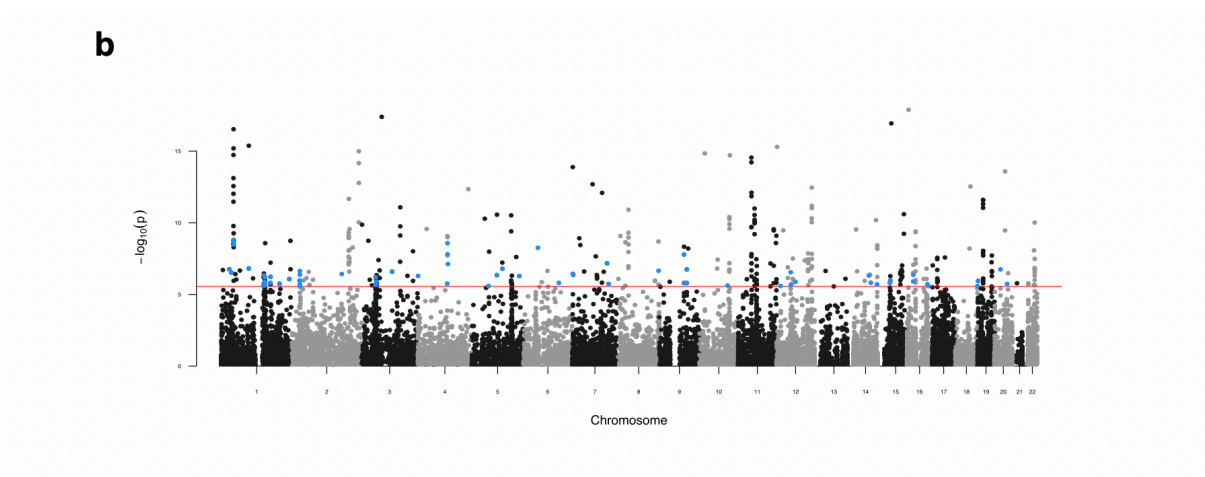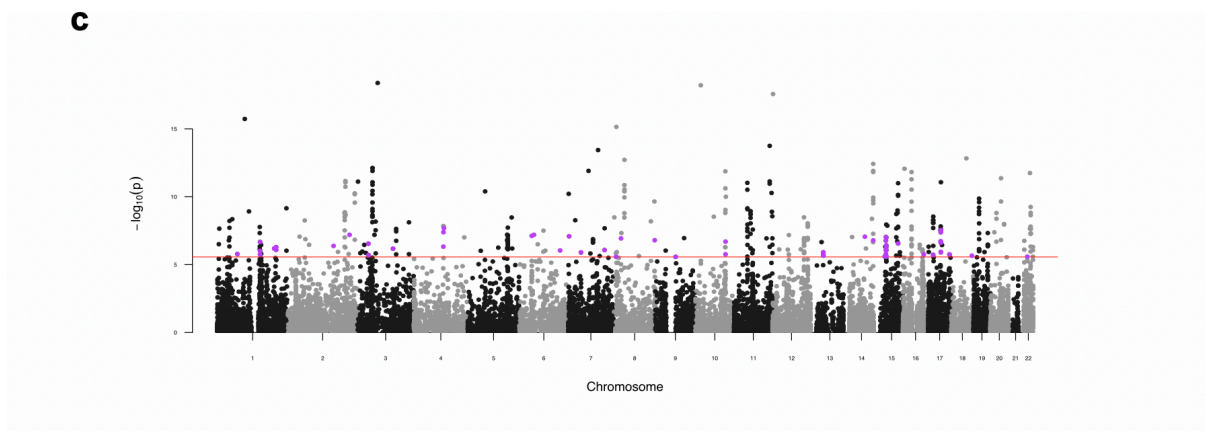

**d**

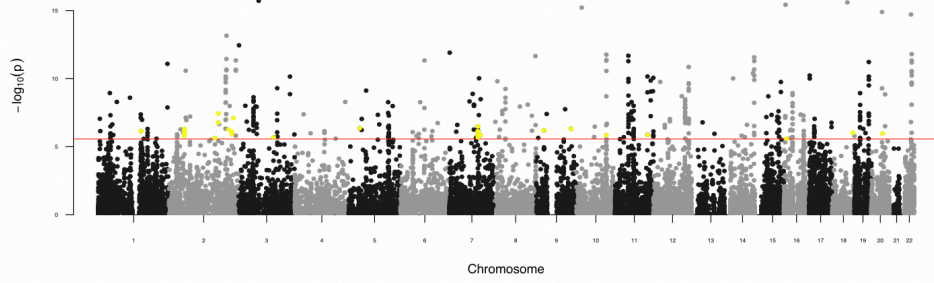

**e**

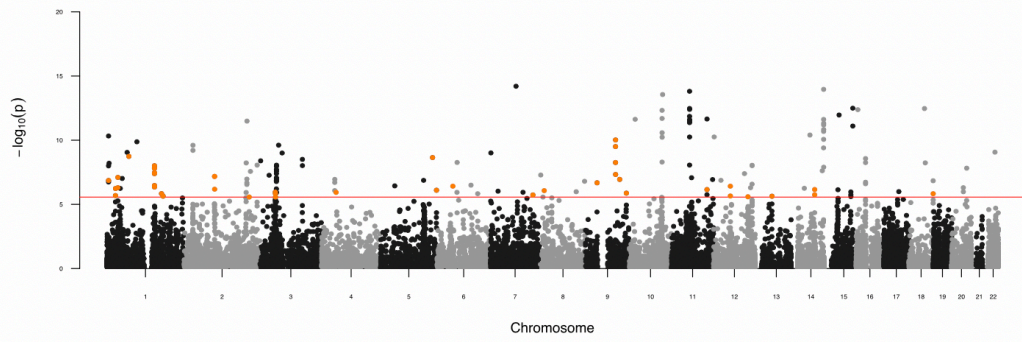

**f**

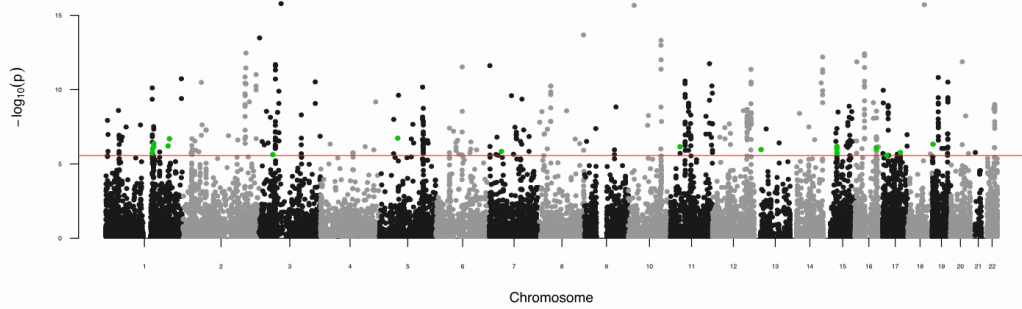

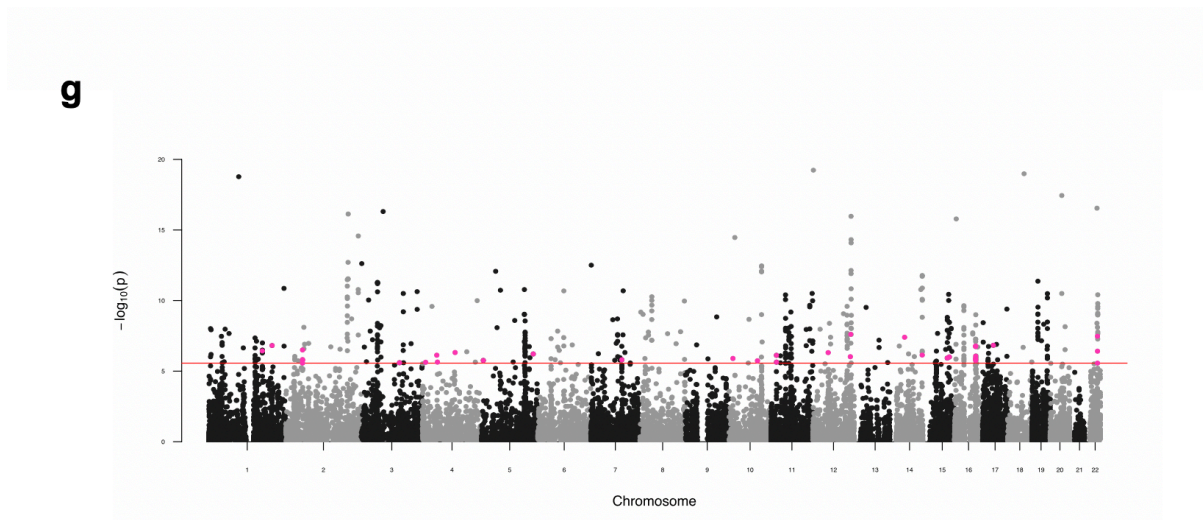

**Supplementary Figure 1. Pairwise genetic meta-analysis of schizophrenia and other psychiatric disorders.** Manhattan plot for each meta-analysis which displays the  $-\log_{10}$  transformed  $P$  value for association for genes which were tagged by at least one SNP in the respective GWAS. The red line represents the Bonferroni threshold for multiple testing correction ( $P < 2.7 \times 10^{-6}$ ). Genes highlighted on each plot were not Bonferroni significant in the individual GWAS but obtained corrected significance in the meta-analysis. **(a)** Schizophrenia (SZ) and Bipolar Disorder (BIP) genetic meta-analysis, **(b)** Schizophrenia and Attention Deficit/Hyperactivity Disorder (ADHD) genetic meta-analysis. **(c)** Schizophrenia and Autism Spectrum Disorder (ASD) genetic meta-analysis, **(d)** Schizophrenia and Eating Disorder (ED) genetic meta-analysis, **(e)** Schizophrenia and Major Depressive Disorder (MDD) genetic meta-analysis, **(f)** Schizophrenia and Obsessive-Compulsive Disorder (OCD) genetic meta-analysis, **(g)** Schizophrenia and Tourette's Syndrome (TS) meta-analysis.

### BIP

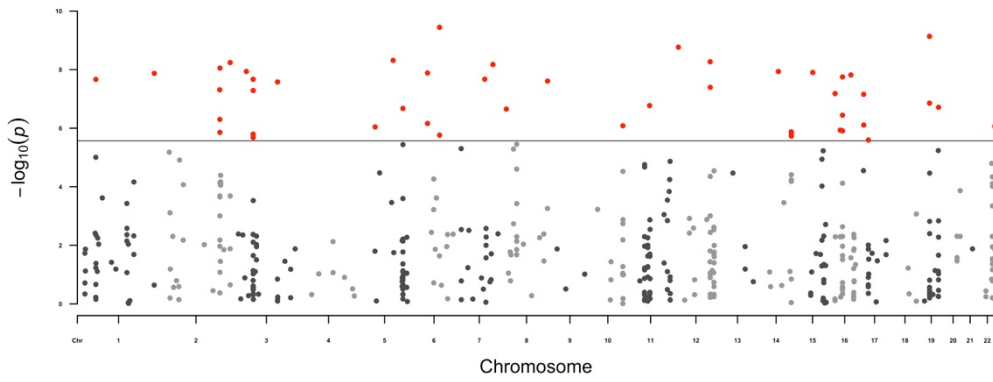

### MDD

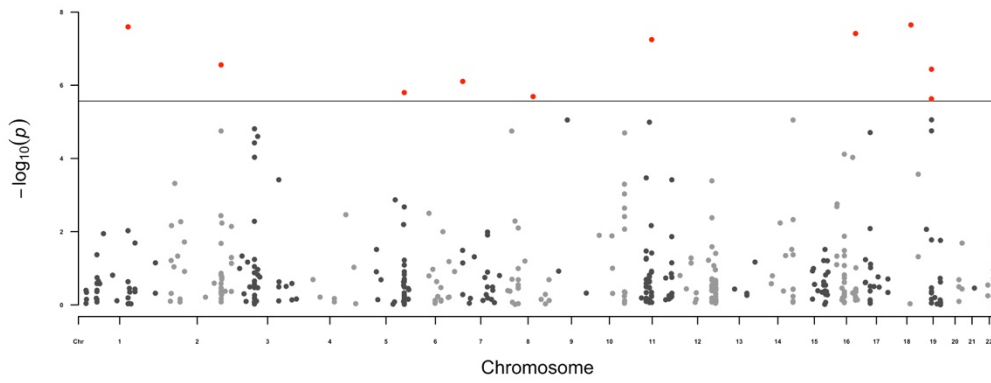

### ADHD

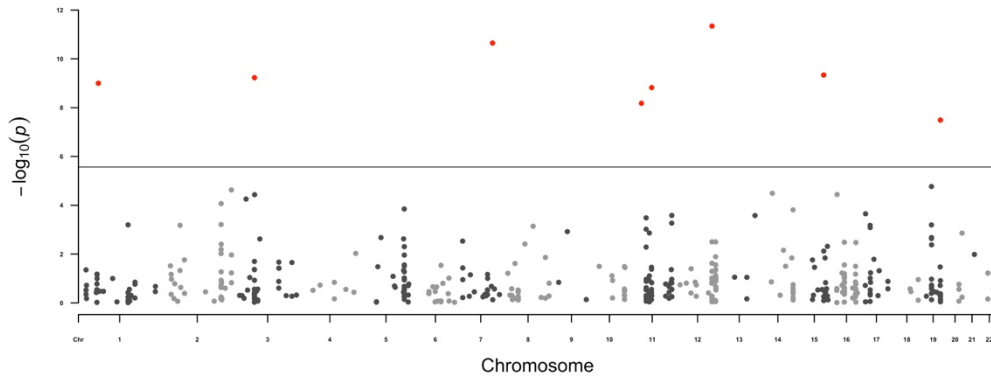

### ASD

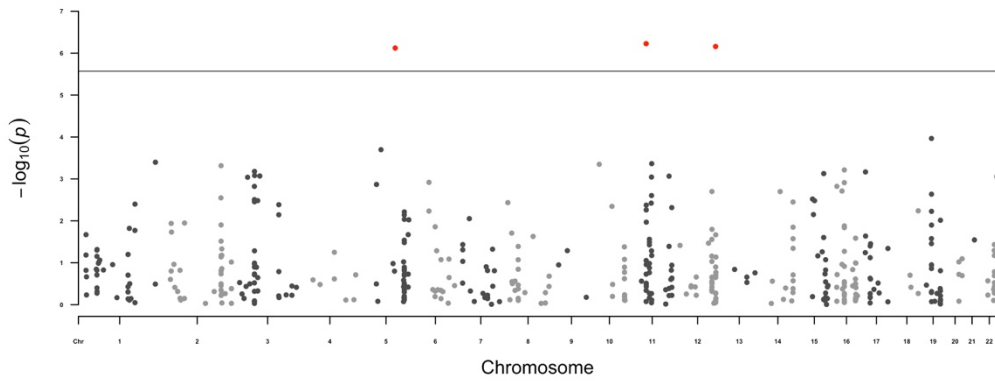

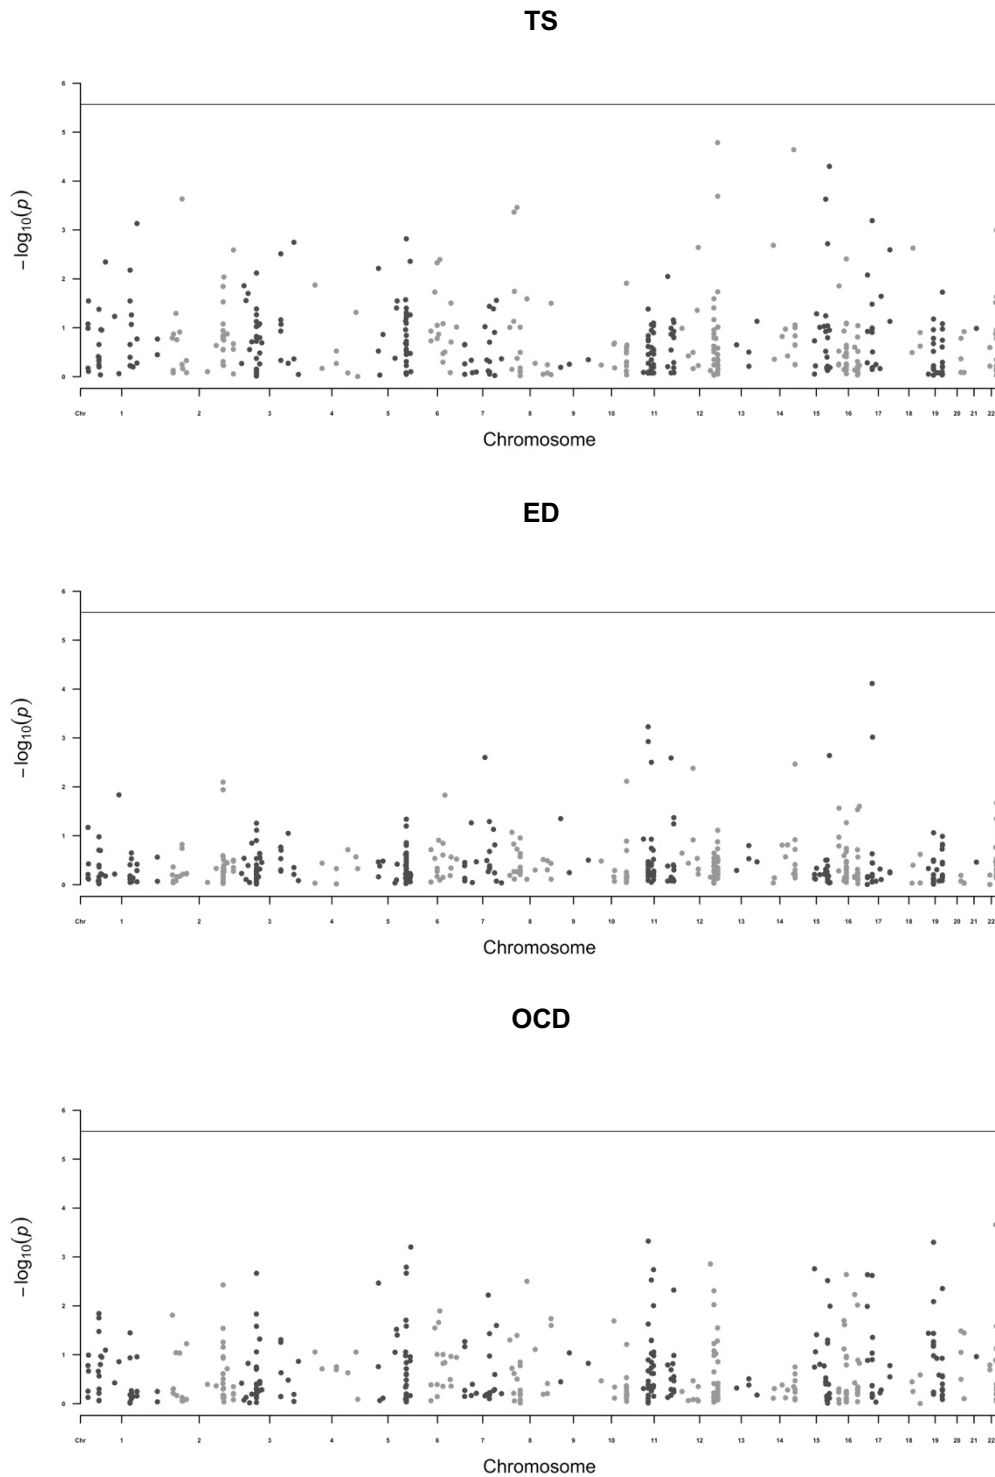

**Supplementary Figure 2. Schizophrenia associated genes shared with other psychiatric disorders.** Association of Bonferroni significant schizophrenia genes with seven other psychiatric disorders. Results presented as Manhattan plot of the  $-\log_{10} P$ -value of association for each gene per disorder. Significant schizophrenia genes by MAGMA which survive correction in each disorder are highlighted red ( $P < 2.7 \times 10^{-6}$ ).
